# Supplementary material
Source: PubMed Central journal article supplement (PMC5214531)
Supplement: NIHMS822930-supplement-1.pdf [file NIHMS822930-supplement-1.pdf]

**Supplemental Table 1**  
**Other Physiological Parameters**

|                                  | <b>WT</b>    | <b>WT + STZ</b> | <b>RAGE KO</b>             | <b>RAGE KO + STZ</b>       |
|----------------------------------|--------------|-----------------|----------------------------|----------------------------|
| <b>Body Weight (grams)</b>       | 25.62 ± 0.50 | 23.91 ± 0.41 *  | 22.14 ± 0.35 <sup>^^</sup> | 20.89 ± 0.47 <sup>^^</sup> |
| <b>Blood Pressure (mmHg)</b>     | 105.5 ± 0.54 | 104.8 ± 0.67    | 102.4 ± 0.55 <sup>^^</sup> | 105.9 ± 0.54 †             |
| <b>Total Cholesterol (mg/dL)</b> | 86.6 ± 0.98  | 90.2 ± 2.71     | 67.8 ± 5.72                | 92.2 ± 11.99               |
| <b>HDL (mg/dL)</b>               | 51.98 ± 0.61 | 52.8 ± 1.56     | 37.2 ± 3.97 <sup>^^</sup>  | 47.46 ± 5.73               |
| <b>LDL (mg/dL)</b>               | 4.6 ± 0.40   | 3.8 ± 0.37      | 4.6 ± 0.24                 | 4.4 ± 0.75                 |
| <b>Triglycerides (mg/dL)</b>     | 97.2 ± 8.49  | 120.6 ± 8.75    | 67.2 ± 2.85 <sup>^</sup>   | 112.8 ± 14.09 †            |

Data is mean ± SEM, n = 5, \* is p<0.05 vs WT, ^ is p<0.05 vs WT+STZ, and † is p<0.05 vs RAGE KO
